# Supplementary material
Source: PubMed Central journal article supplement (PMC8970626)
Supplement: NIHMS1790324-supplement-Supplemental_file.pdf [file NIHMS1790324-supplement-Supplemental_file.pdf]

# Characterization of a cleavable fusion of human CYP24A1 with Adrenodoxin reveals the variable role of hydrophobics in redox partner binding

**Natalie Jay, Sean R. Duffy, D. Fernando Estrada\***

Department of Biochemistry, University at Buffalo, Buffalo NY 14203

\*Corresponding author: [dfestrad@buffalo.edu](mailto:dfestrad@buffalo.edu), (716) 829-2767

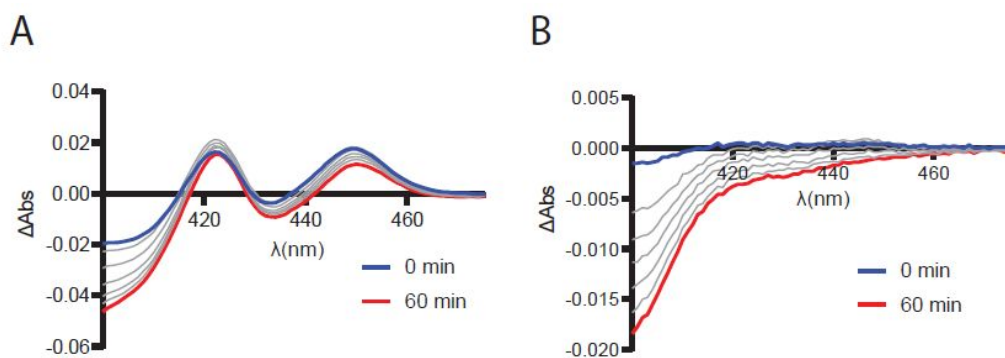

**Figure S1.** CO-difference spectra from cell lysate from expression of **(A)** hCYP24A1\_hAdx or **(B)** hCYP24A1. Difference spectra were developed over 60 minutes.

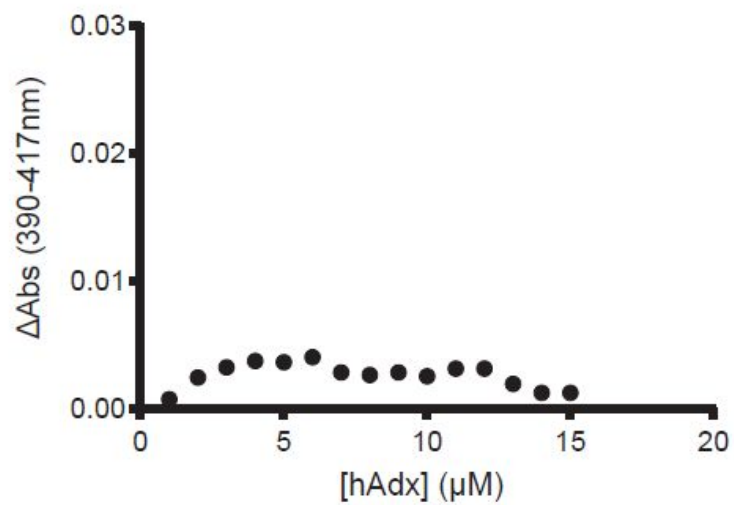

Figure S2. Absorbance changes in 1  $\mu\text{M}$  hCYP24A1 as a result of titration with hAdx.

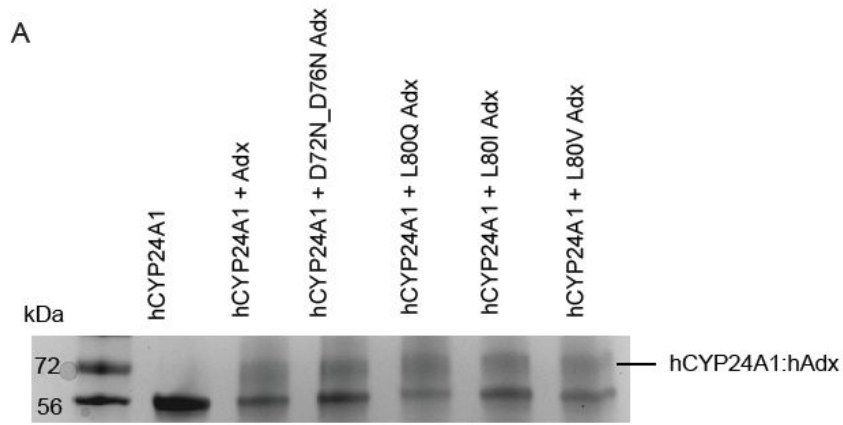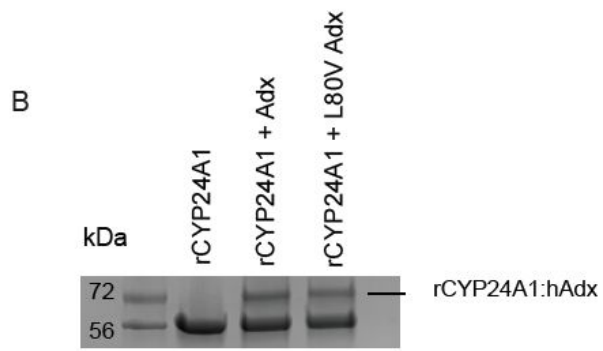

**Figure S3. Complex formation between CYP24A1 and Adx mutants.** EDC crosslinking with **(A)** human CYP24A1 or **(B)** rat CYP24A1.
